# Supplementary material for: The influence of developmental diet on reproduction and metabolism in Drosophila
Source: PubMed Central journal article supplement (PMC7392729; doi:10.1186/s12862-020-01663-y), 2020-07-29
Supplement: 12862_2020_1663_MOESM1_ESM.pdf [file 12862_2020_1663_MOESM1_ESM.pdf]

## *Supplementary Information*

# **The influence of developmental diet on reproduction and metabolism in *Drosophila***

**Peter Klepsatel, Diana Knoblochová, Thirnahalli Nagaraj Girish, Heinrich Dircksen  
and Martina Gálíková**

### **Supporting Figure Legends**

**Figure S1.** Intraspecific variation in the effect of sugar in the adult diet on the amount of fat in 10 day-old males. Data for each population/strain were analysed by one-way ANOVA followed by Tukey's HSD test ( $\alpha = 0.05$ ). Plots marked with different letters are significantly different from each other. Box plots depict minimum, first quartile, median, third quartile, and maximum value. For details, see Material and methods.

Figure S1

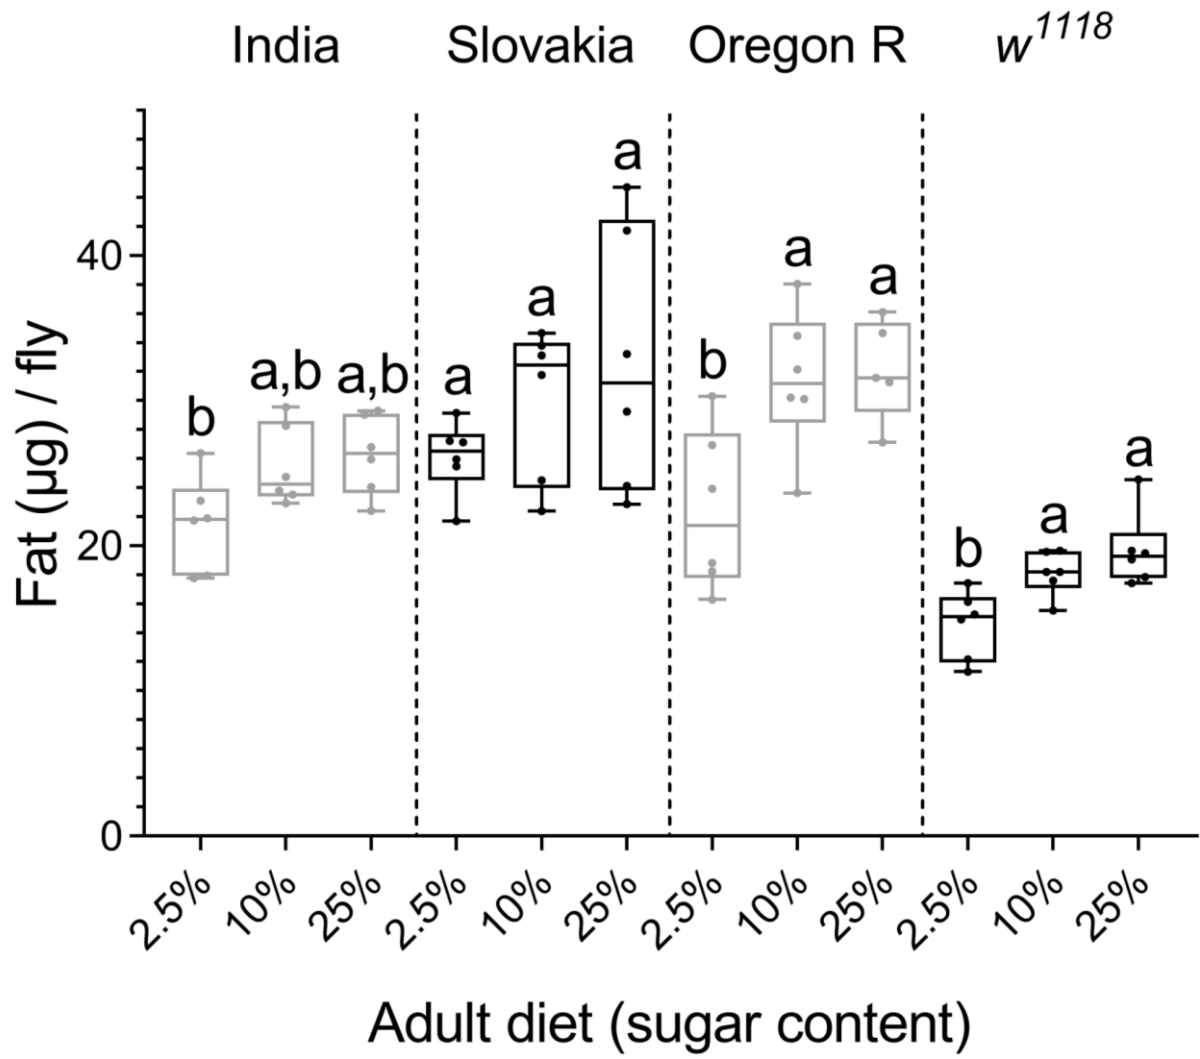

## Supplementary Tables

**Table S1.** The results of ANOVA for the effect of population, the **yeast content** in the developmental and the adult diet, and their interactions on early fecundity, egg-to-adult viability, early fecundity standardised for body size, and early fecundity per ovariole. *df* - degrees of freedom; SSQ - the sum of squares for each source of variation.

| Trait                                      | Source of variation                          | <i>df</i> | SSQ      | <i>F</i> -ratio | <i>P</i> -value |
|--------------------------------------------|----------------------------------------------|-----------|----------|-----------------|-----------------|
| Early fecundity                            | Population                                   | 1         | 18902    | 4.10            | 0.043           |
|                                            | Developmental diet                           | 2         | 199258   | 21.63           | < 0.0001        |
|                                            | Adult diet                                   | 2         | 12106730 | 1314.13         | < 0.0001        |
|                                            | Population × Developmental diet              | 2         | 1718     | 0.19            | 0.830           |
|                                            | Population × Adult diet                      | 2         | 40276    | 4.37            | 0.013           |
|                                            | Developmental diet × Adult diet              | 4         | 45131    | 2.45            | 0.045           |
|                                            | Population × Developmental diet × Adult diet | 4         | 60691    | 3.29            | 0.011           |
|                                            | Error                                        | 497       | 2289371  | -               | -               |
| Egg-to-adult viability                     | Population                                   | 1         | 0.49     | 8.20            | 0.004           |
|                                            | Developmental diet                           | 2         | 0.18     | 1.47            | 0.232           |
|                                            | Adult diet                                   | 2         | 5.96     | 49.61           | < 0.0001        |
|                                            | Population × Developmental diet              | 2         | 0.09     | 0.72            | 0.490           |
|                                            | Population × Adult diet                      | 2         | 0.04     | 0.33            | 0.716           |
|                                            | Developmental diet × Adult diet              | 4         | 0.37     | 1.53            | 0.193           |
|                                            | Population × Developmental diet × Adult diet | 4         | 0.13     | 0.56            | 0.696           |
|                                            | Error                                        | 492       | 29.53    | -               | -               |
| Early fecundity standardised for body size | Population                                   | 1         | 4190     | 0.72            | 0.396           |
|                                            | Developmental diet                           | 2         | 4667     | 0.40            | 0.669           |
|                                            | Adult diet                                   | 2         | 14845177 | 1280.39         | < 0.0001        |
|                                            | Population × Developmental diet              | 2         | 2945     | 0.25            | 0.776           |
|                                            | Population × Adult diet                      | 2         | 28183    | 2.43            | 0.089           |
|                                            | Developmental diet × Adult diet              | 4         | 19629    | 0.85            | 0.496           |
|                                            | Population × Developmental diet × Adult diet | 4         | 102027   | 4.40            | 0.002           |
|                                            | Error                                        | 497       | 2881184  | -               | -               |
| Early fecundity per ovariole               | Population                                   | 1         | 388.48   | 102.86          | < 0.0001        |
|                                            | Developmental diet                           | 2         | 21.21    | 2.81            | 0.061           |
|                                            | Adult diet                                   | 2         | 9328.50  | 1235.02         | < 0.0001        |
|                                            | Population × Developmental diet              | 2         | 1.83     | 0.24            | 0.785           |
|                                            | Population × Adult diet                      | 2         | 131.15   | 17.36           | < 0.0001        |
|                                            | Developmental diet × Adult diet              | 4         | 9.26     | 0.61            | 0.653           |
|                                            | Population × Developmental diet × Adult diet | 4         | 66.90    | 4.43            | 0.002           |
|                                            | Error                                        | 496       | 1873.22  | -               | -               |

**Table S2.** The results of ANOVA for the effect of population, the **sugar content** in the developmental and adult diet, and their interactions on early fecundity, egg-to-adult viability, early fecundity standardised for body size, and early fecundity per ovariole. *df* - degrees of freedom; SSQ - the sum of squares for each source of variation.

| Trait                                      | Source of variation                          | <i>df</i> | SSQ       | <i>F</i> -ratio | <i>P</i> -value |
|--------------------------------------------|----------------------------------------------|-----------|-----------|-----------------|-----------------|
| Early fecundity                            | Population                                   | 1         | 72658.6   | 19.75           | < 0.0001        |
|                                            | Developmental diet                           | 2         | 483997.4  | 65.77           | < 0.0001        |
|                                            | Adult diet                                   | 2         | 2651179.5 | 360.26          | < 0.0001        |
|                                            | Population × Developmental diet              | 2         | 40361.2   | 5.49            | 0.004           |
|                                            | Population × Adult diet                      | 2         | 105291.4  | 14.31           | < 0.0001        |
|                                            | Developmental diet × Adult diet              | 4         | 23363.8   | 1.59            | 0.176           |
|                                            | Population × Developmental diet × Adult diet | 4         | 20199.4   | 1.37            | 0.242           |
|                                            | Error                                        | 499       | 1836100.6 | -               | -               |
| Egg-to-adult viability                     | Population                                   | 1         | 1.00      | 32.41           | < 0.0001        |
|                                            | Developmental diet                           | 2         | 0.012     | 0.24            | 0.785           |
|                                            | Adult diet                                   | 2         | 0.20      | 3.26            | 0.039           |
|                                            | Population × Developmental diet              | 2         | 0.08      | 1.27            | 0.282           |
|                                            | Population × Adult diet                      | 2         | 0.02      | 0.37            | 0.694           |
|                                            | Developmental diet × Adult diet              | 4         | 0.081     | 0.64            | 0.636           |
|                                            | Population × Developmental diet × Adult diet | 4         | 0.09      | 0.69            | 0.602           |
|                                            | Error                                        | 496       | 15.35     | -               | -               |
| Early fecundity standardised for body size | Population                                   | 1         | 66837.3   | 15.18           | 0.0001          |
|                                            | Developmental diet                           | 2         | 146189.5  | 16.61           | < 0.0001        |
|                                            | Adult diet                                   | 2         | 3086759.8 | 350.61          | < 0.0001        |
|                                            | Population × Developmental diet              | 2         | 28127.4   | 3.20            | 0.042           |
|                                            | Population × Adult diet                      | 2         | 163486.6  | 18.57           | < 0.0001        |
|                                            | Developmental diet × Adult diet              | 4         | 37745.9   | 2.14            | 0.074           |
|                                            | Population × Developmental diet × Adult diet | 4         | 15170.5   | 0.86            | 0.487           |
|                                            | Error                                        | 499       | 2196583.7 | -               | -               |
| Early fecundity per ovariole               | Population                                   | 1         | 271.89    | 86.60           | < 0.0001        |
|                                            | Developmental diet                           | 2         | 16.86     | 2.69            | 0.069           |
|                                            | Adult diet                                   | 2         | 1871.85   | 298.11          | < 0.0001        |
|                                            | Population × Developmental diet              | 2         | 78.27     | 12.47           | < 0.0001        |
|                                            | Population × Adult diet                      | 2         | 157.53    | 25.09           | < 0.0001        |
|                                            | Developmental diet × Adult diet              | 4         | 12.32     | 0.98            | 0.417           |
|                                            | Population × Developmental diet × Adult diet | 4         | 8.69      | 0.69            | 0.598           |
|                                            | Error                                        | 499       | 1566.60   | -               | -               |

**Table S3.** The results of ANOVA for the effect of population, the **yeast content** in the developmental and the adult diet, and a match/mismatch between developmental and adult nutritional environment on early fecundity, egg-to-adult viability, early fecundity standardised for body size, and early fecundity per ovariole. *df* - degrees of freedom; SSQ - the sum of squares for each source of variation.

| <b>Trait</b>                               | <b>Source of variation</b> | <b>df</b> | <b>SSQ</b> | <b>F-ratio</b> | <b>P-value</b> |
|--------------------------------------------|----------------------------|-----------|------------|----------------|----------------|
| Early fecundity                            | Population                 | 1         | 20391      | 4.31           | 0.039          |
|                                            | Developmental diet         | 2         | 186422     | 19.68          | < 0.0001       |
|                                            | Adult diet                 | 2         | 11854545   | 1251.57        | < 0.0001       |
|                                            | Mismatch                   | 2         | 36231      | 3.83           | 0.022*         |
|                                            | Error                      | 507       | 2401095    | -              | -              |
| Egg-to-adult viability                     | Population                 | 1         | 0.47       | 7.89           | 0.005          |
|                                            | Developmental diet         | 2         | 0.164      | 1.31           | 0.272          |
|                                            | Adult diet                 | 2         | 6.01       | 50.33          | < 0.0001       |
|                                            | Mismatch                   | 2         | 0.18       | 1.48           | 0.230          |
|                                            | Error                      | 502       | 29.97      | -              | -              |
| Early fecundity standardised for body size | Population                 | 1         | 5129       | 0.86           | 0.354          |
|                                            | Developmental diet         | 2         | 12735      | 1.07           | 0.344          |
|                                            | Adult diet                 | 2         | 14623209   | 1228.54        | < 0.0001       |
|                                            | Mismatch                   | 2         | 16470      | 1.38           | 0.252          |
|                                            | Error                      | 507       | 3017385    | -              | -              |
| Early fecundity per ovariole               | Population                 | 1         | 381.35     | 93.08          | < 0.0001       |
|                                            | Developmental diet         | 2         | 28.58      | 3.49           | 0.031          |
|                                            | Adult diet                 | 2         | 9208.13    | 1123.77        | < 0.0001       |
|                                            | Mismatch                   | 2         | 7.26       | 0.89           | 0.413          |
|                                            | Error                      | 506       | 2073.07    | -              | -              |

\* Comparison of residuals: 0 ( $11.83 \pm 5.25 \text{ SEM}$ ) > 2 ( $-4.27 \pm 6.36$ ) > 1 ( $-6.62 \pm 4.53$ )

**Table S4.** The results of ANOVA for the effect of population, the **sugar content** in the developmental and the adult diet, and a match/mismatch between developmental and adult nutritional environment on early fecundity, egg-to-adult viability, early fecundity standardised for body size, and early fecundity per ovariole. *df* - degrees of freedom; SSQ - the sum of squares for each source of variation.

| <b>Trait</b>                               | <b>Source of variation</b> | <b><i>df</i></b> | <b>SSQ</b> | <b><i>F</i>-ratio</b> | <b><i>P</i>-value</b> |
|--------------------------------------------|----------------------------|------------------|------------|-----------------------|-----------------------|
| Early fecundity                            | Population                 | 1                | 71777.2    | 18.22                 | < 0.0001              |
|                                            | Developmental diet         | 2                | 468880.8   | 59.51                 | < 0.0001              |
|                                            | Adult diet                 | 2                | 2617852.8  | 332.25                | < 0.0001              |
|                                            | Mismatch                   | 2                | 21894.5    | 2.78                  | 0.063*                |
|                                            | Error                      | 509              | 2005219.6  | -                     | -                     |
| Egg-to-adult viability                     | Population                 | 1                | 0.99       | 32.24                 | < 0.0001              |
|                                            | Developmental diet         | 2                | 0.02       | 0.29                  | 0.747                 |
|                                            | Adult diet                 | 2                | 0.15       | 2.35                  | 0.096                 |
|                                            | Mismatch                   | 2                | 0.03       | 0.50                  | 0.607                 |
|                                            | Error                      | 506              | 15.59      | -                     | -                     |
| Early fecundity standardised for body size | Population                 | 1                | 67226.1    | 14.2209               | 0.0002                |
|                                            | Developmental diet         | 2                | 151038.7   | 15.9752               | < 0.0001              |
|                                            | Adult diet                 | 2                | 3054743.2  | 323.0969              | < 0.0001              |
|                                            | Mismatch                   | 2                | 35966.8    | 3.8042                | 0.023**               |
|                                            | Error                      | 509              | 2406188.4  | -                     | -                     |
| Early fecundity per ovariole               | Population                 | 1                | 271.74     | 76.43                 | < 0.0001              |
|                                            | Developmental diet         | 2                | 16.22      | 2.28                  | 0.1033                |
|                                            | Adult diet                 | 2                | 1874.67    | 263.64                | < 0.0001              |
|                                            | Mismatch                   | 2                | 12.52      | 1.76                  | 0.173                 |
|                                            | Error                      | 509              | 1809.66    | -                     | -                     |

\*Comparison of residuals: 1 ( $3.95 \pm 4.09$ ) > 0 ( $1.09 \pm 4.81$ ) > 2 ( $-9.72 \pm 5.86$ )

\*\* Comparison of residuals: 1 ( $8.00 \pm 4.48$ ) > 0 ( $-6.44 \pm 5.27$ ) > 2 ( $-6.88 \pm 6.42$ )

**Table S5.** The results of ANOVA for the effect of population and the **yeast content** in the developmental diet, and their interactions on various traits on different adult diets. *df* - degrees of freedom; SSQ - the sum of squares for each source of variation.

| Trait                                      | Adult diet | Source of variation             | <i>df</i> | SSQ       | <i>F</i> -ratio | <i>P</i> -value |
|--------------------------------------------|------------|---------------------------------|-----------|-----------|-----------------|-----------------|
| Early fecundity                            | 2.5% yeast | Population                      | 1         | 4964.22   | 9.55            | 0.002           |
|                                            |            | Developmental diet              | 2         | 9895.71   | 9.51            | 0.0001          |
|                                            |            | Population × Developmental diet | 2         | 630.67    | 0.61            | 0.547           |
|                                            |            | Error                           | 168       | 87368.47  | -               | -               |
|                                            | 10% yeast  | Population                      | 1         | 3270.16   | 0.750           | 0.388           |
|                                            |            | Developmental diet              | 2         | 140918.69 | 16.153          | < 0.0001        |
|                                            |            | Population × Developmental diet | 2         | 42866.97  | 4.914           | 0.009           |
|                                            |            | Error                           | 161       | 702267.01 | -               | -               |
|                                            | 25% yeast  | Population                      | 1         | 51857.10  | 5.81            | 0.017           |
|                                            |            | Developmental diet              | 2         | 92924.45  | 5.20            | 0.006           |
|                                            |            | Population × Developmental diet | 2         | 18610.12  | 1.04            | 0.355           |
|                                            |            | Error                           | 168       | 1499735.2 | -               | -               |
| Egg-to-adult viability                     | 2.5% yeast | Population                      | 1         | 0.32      | 4.03            | 0.046           |
|                                            |            | Developmental diet              | 2         | 0.04      | 0.27            | 0.763           |
|                                            |            | Population × Developmental diet | 2         | 0.15      | 0.93            | 0.396           |
|                                            |            | Error                           | 166       | 13.36     | -               | -               |
|                                            | 10% yeast  | Population                      | 1         | 0.12      | 2.09            | 0.150           |
|                                            |            | Developmental diet              | 2         | 0.16      | 1.46            | 0.235           |
|                                            |            | Population × Developmental diet | 2         | 0.03      | 0.27            | 0.761           |
|                                            |            | Error                           | 159       | 8.81      | -               | -               |
|                                            | 25% yeast  | Population                      | 1         | 0.09      | 2.13            | 0.146           |
|                                            |            | Developmental diet              | 2         | 0.34      | 3.85            | 0.023           |
|                                            |            | Population × Developmental diet | 2         | 0.04      | 0.45            | 0.638           |
|                                            |            | Error                           | 167       | 7.36      | -               | -               |
| Early fecundity standardised for body size | 2.5% yeast | Population                      | 1         | 7080.53   | 12.07           | 0.0007          |
|                                            |            | Developmental diet              | 2         | 2062.87   | 1.76            | 0.176           |
|                                            |            | Population × Developmental diet | 2         | 262.74    | 0.22            | 0.800           |
|                                            |            | Error                           | 168       | 98588.26  | -               | -               |
|                                            | 10% yeast  | Population                      | 1         | 9403.06   | 1.45            | 0.231           |
|                                            |            | Developmental diet              | 2         | 18024.84  | 1.39            | 0.253           |
|                                            |            | Population × Developmental diet | 2         | 73195.37  | 5.63            | 0.004           |
|                                            |            | Error                           | 161       | 1046942.6 | -               | -               |
|                                            | 25% yeast  | Population                      | 1         | 16314.93  | 1.58            | 0.211           |
|                                            |            | Developmental diet              | 2         | 3831.39   | 0.19            | 0.831           |
|                                            |            | Population × Developmental diet | 2         | 31162.88  | 1.51            | 0.224           |
|                                            |            | Error                           | 168       | 1735653.3 | -               | -               |
| Early fecundity per ovariole               | 2.5% yeast | Population                      | 1         | 5.54      | 11.31           | 0.001           |
|                                            |            | Developmental diet              | 2         | 0.49      | 0.50            | 0.610           |
|                                            |            | Population × Developmental diet | 2         | 0.07      | 0.07            | 0.928           |
|                                            |            | Error                           | 167       | 81.851    | -               | -               |
|                                            | 10% yeast  | Population                      | 1         | 316.40    | 74.51           | < 0.0001        |
|                                            |            | Developmental diet              | 2         | 20.67     | 2.43            | 0.091           |
|                                            |            | Population × Developmental diet | 2         | 39.32     | 4.63            | 0.011           |
|                                            |            | Error                           | 161       | 683.71    | -               | -               |
|                                            | 25% yeast  | Population                      | 1         | 193.12    | 29.29           | < 0.0001        |
|                                            |            | Developmental diet              | 2         | 8.72      | 0.66            | 0.518           |
|                                            |            | Population × Developmental diet | 2         | 29.05     | 2.20            | 0.114           |
|                                            |            | Error                           | 168       | 1107.67   | -               | -               |

**Table S6.** The results of ANOVA for the effect of population and the **sugar content** in the developmental diet, and their interactions on various traits on different adult diets. *df* - degrees of freedom; SSQ - the sum of squares for each source of variation.

| Trait                                      | Adult diet | Source of variation             | <i>df</i> | SSQ       | <i>F</i> -ratio | <i>P</i> -value |
|--------------------------------------------|------------|---------------------------------|-----------|-----------|-----------------|-----------------|
| Early fecundity                            | 2.5% sugar | Population                      | 1         | 9254.83   | 1.93            | 0.167           |
|                                            |            | Developmental diet              | 2         | 223530.80 | 23.32           | < 0.0001        |
|                                            |            | Population × Developmental diet | 2         | 35671.06  | 3.72            | 0.026           |
|                                            |            | Error                           | 166       | 795514.8  | -               | -               |
|                                            | 10% sugar  | Population                      | 1         | 44295.13  | 10.79           | 0.001           |
|                                            |            | Developmental diet              | 2         | 184782.42 | 22.51           | < 0.0001        |
|                                            |            | Population × Developmental diet | 2         | 22130.78  | 2.70            | 0.071           |
|                                            |            | Error                           | 166       | 681460.39 | -               | -               |
|                                            | 25% sugar  | Population                      | 1         | 124862.92 | 58.06           | < 0.0001        |
|                                            |            | Developmental diet              | 2         | 100485.85 | 23.36           | < 0.0001        |
|                                            |            | Population × Developmental diet | 2         | 3253.62   | 0.76            | 0.471           |
|                                            |            | Error                           | 167       | 359125.40 | -               | -               |
| Egg-to-adult viability                     | 2.5% sugar | Population                      | 1         | 0.39      | 10.39           | 0.002           |
|                                            |            | Developmental diet              | 2         | 0.03      | 0.46            | 0.630           |
|                                            |            | Population × Developmental diet | 2         | 0.08      | 1.02            | 0.365           |
|                                            |            | Error                           | 166       | 6.26      | -               | -               |
|                                            | 10% sugar  | Population                      | 1         | 0.21      | 7.47            | 0.007           |
|                                            |            | Developmental diet              | 2         | 0.01      | 0.13            | 0.882           |
|                                            |            | Population × Developmental diet | 2         | 0.011     | 0.25            | 0.783           |
|                                            |            | Error                           | 164       | 4.54      | -               | -               |
|                                            | 25% sugar  | Population                      | 1         | 0.43      | 15.61           | 0.0001          |
|                                            |            | Developmental diet              | 2         | 0.05      | 0.95            | 0.388           |
|                                            |            | Population × Developmental diet | 2         | 0.08      | 1.39            | 0.253           |
|                                            |            | Error                           | 166       | 4.56      | -               | -               |
| Early fecundity standardised for body size | 2.5% sugar | Population                      | 1         | 199980.58 | 31.43           | < 0.0001        |
|                                            |            | Developmental diet              | 2         | 61419.77  | 4.83            | 0.009           |
|                                            |            | Population × Developmental diet | 2         | 36926.78  | 2.90            | 0.058           |
|                                            |            | Error                           | 166       | 1056164.9 | -               | -               |
|                                            | 10% sugar  | Population                      | 1         | 14842.07  | 3.41            | 0.067           |
|                                            |            | Developmental diet              | 2         | 80620.18  | 9.25            | 0.0002          |
|                                            |            | Population × Developmental diet | 2         | 5857.54   | 0.67            | 0.512           |
|                                            |            | Error                           | 166       | 723019.97 | -               | -               |
|                                            | 25% sugar  | Population                      | 1         | 14930.74  | 5.97            | 0.016           |
|                                            |            | Developmental diet              | 2         | 42645.98  | 8.53            | 0.0003          |
|                                            |            | Population × Developmental diet | 2         | 614.80    | 0.12            | 0.884           |
|                                            |            | Error                           | 167       | 417398.91 | -               | -               |
| Early fecundity per ovariole               | 2.5% sugar | Population                      | 1         | 355.50    | 86.14           | < 0.0001        |
|                                            |            | Developmental diet              | 2         | 17.07     | 2.07            | 0.130           |
|                                            |            | Population × Developmental diet | 2         | 54.94     | 6.66            | 0.002           |
|                                            |            | Error                           | 166       | 685.06    | -               | -               |
|                                            | 10% sugar  | Population                      | 1         | 71.27     | 21.17           | < 0.0001        |
|                                            |            | Developmental diet              | 2         | 6.67      | 0.99            | 0.374           |
|                                            |            | Population × Developmental diet | 2         | 17.00     | 2.53            | 0.083           |
|                                            |            | Error                           | 166       | 558.94    | -               | -               |
|                                            | 25% sugar  | Population                      | 1         | 1.52      | 0.79            | 0.376           |
|                                            |            | Developmental diet              | 2         | 5.66      | 1.47            | 0.234           |
|                                            |            | Population × Developmental diet | 2         | 14.91     | 3.86            | 0.023           |
|                                            |            | Error                           | 167       | 322.60    | -               | -               |



**Table S7.** The results of ANOVA for the effect of population and the **yeast or sugar content** in the developmental diet, and their interactions on thorax length and ovariole number. *df* - degrees of freedom; SSQ - the sum of squares for each source of variation.

| <b>Dietary component</b> | <b>Trait</b>    | <b>Source of variation</b>      | <b><i>df</i></b> | <b>SSQ</b> | <b><i>F</i>-ratio</b> | <b><i>P</i>-value</b> |
|--------------------------|-----------------|---------------------------------|------------------|------------|-----------------------|-----------------------|
| Yeast                    | Thorax length   | Population                      | 1                | 0.003      | 2.89                  | 0.090                 |
|                          |                 | Developmental diet              | 2                | 0.18       | 74.96                 | < 0.0001              |
|                          |                 | Population × Developmental diet | 2                | 0.001      | 0.57                  | 0.568                 |
|                          |                 | Error                           | 509              | 0.61       | -                     | -                     |
|                          | Ovariole number | Population                      | 1                | 9973.47    | 696.19                | < 0.0001              |
|                          |                 | Developmental diet              | 2                | 2017.89    | 70.43                 | < 0.0001              |
|                          |                 | Population × Developmental diet | 2                | 13.03      | 0.45                  | 0.635                 |
|                          |                 | Error                           | 508              | 7277.53    | -                     | -                     |
| Sugar                    | Thorax length   | Population                      | 1                | 0.20       | 215.67                | < 0.0001              |
|                          |                 | Developmental diet              | 2                | 0.11       | 59.02                 | < 0.0001              |
|                          |                 | Population × Developmental diet | 2                | 0.01       | 4.76                  | 0.009                 |
|                          |                 | Error                           | 511              | 0.48       | -                     | -                     |
|                          | Ovariole number | Population                      | 1                | 8201.63    | 750.69                | < 0.0001              |
|                          |                 | Developmental diet              | 2                | 3575.84    | 163.65                | < 0.0001              |
|                          |                 | Population × Developmental diet | 2                | 322.52     | 14.76                 | < 0.0001              |
|                          |                 | Error                           | 511              | 5582.88    | -                     | -                     |

**Table S8.** The ANCOVA results for early fecundity with the **yeast content** in the developmental diet as the fixed factor and thorax length or ovariole number as the covariate. *df* - degrees of freedom; SSQ - the sum of squares for each source of variation.

| Adult diet | Population | Source of variation | <i>df</i> | SSQ       | <i>F</i> -ratio | <i>P</i> -value | Source of variation | <i>df</i> | SSQ       | <i>F</i> -ratio | <i>P</i> -value |
|------------|------------|---------------------|-----------|-----------|-----------------|-----------------|---------------------|-----------|-----------|-----------------|-----------------|
| 2.5% yeast | India      | Developmental diet  | 2         | 422.89    | 0.49            | 0.615           | Developmental diet  | 2         | 422.89    | 0.49            | 0.615           |
|            |            | Thorax length       | 1         | 5318.31   | 12.31           | 0.0007          | Ovariole number     | 1         | 5318.31   | 12.31           | 0.0007          |
|            |            | Error               | 85        | 36732.97  | -               | -               | Error               | 85        | 36732.97  | -               | -               |
|            | Slovakia   | Developmental diet  | 2         | 2513.43   | 2.60            | 0.081           | Developmental diet  | 2         | 3166.69   | 2.89            | 0.061           |
|            |            | Thorax length       | 1         | 6142.72   | 12.70           | 0.0006          | Ovariole number     | 1         | 815.12    | 1.49            | 0.226           |
|            |            | Error               | 81        | 39174.46  | -               | -               | Error               | 80        | 43839.02  | -               | -               |
| 10% yeast  | India      | Developmental diet  | 2         | 83109.84  | 12.02           | < 0.0001        | Developmental diet  | 2         | 83109.84  | 12.02           | < 0.0001        |
|            |            | Thorax length       | 1         | 13301.22  | 3.85            | 0.053           | Ovariole number     | 1         | 13301.22  | 3.85            | 0.053           |
|            |            | Error               | 81        | 279994.23 | -               | -               | Error               | 81        | 279994.23 | -               | -               |
|            | Slovakia   | Developmental diet  | 2         | 20077.33  | 1.99            | 0.143           | Developmental diet  | 2         | 29072.29  | 2.79            | 0.068           |
|            |            | Thorax length       | 1         | 15917.88  | 3.16            | 0.079           | Ovariole number     | 1         | 1966.26   | 0.38            | 0.541           |
|            |            | Error               | 78        | 393053.68 | -               | -               | Error               | 78        | 407005.30 | -               | -               |
| 25% yeast  | India      | Developmental diet  | 2         | 5798.61   | 0.43            | 0.654           | Developmental diet  | 2         | 5798.61   | 0.43            | 0.654           |
|            |            | Thorax length       | 1         | 79798.87  | 11.77           | 0.0009          | Ovariole number     | 1         | 79798.87  | 11.77           | 0.0009          |
|            |            | Error               | 83        | 562799.75 | -               | -               | Error               | 83        | 562799.75 | -               | -               |
|            | Slovakia   | Developmental diet  | 2         | 31619.85  | 1.59            | 0.209           | Developmental diet  | 2         | 74309.01  | 3.63            | 0.031           |
|            |            | Thorax length       | 1         | 34000.24  | 3.43            | 0.068           | Ovariole number     | 1         | 8139.57   | 0.80            | 0.375           |
|            |            | Error               | 83        | 823136.31 | -               | -               | Error               | 83        | 848996.98 | -               | -               |

**Table S9.** The ANCOVA results for early fecundity with the **sugar content** in the developmental diet as the fixed factor and thorax length or ovariole number as the covariate. *df* - degrees of freedom; SSQ - the sum of squares for each source of variation.

| Adult diet | Population | Source of variation | <i>df</i> | SSQ       | <i>F</i> -ratio | <i>P</i> -value | Source of variation | <i>df</i> | SSQ       | <i>F</i> -ratio | <i>P</i> -value |
|------------|------------|---------------------|-----------|-----------|-----------------|-----------------|---------------------|-----------|-----------|-----------------|-----------------|
| 2.5% sugar | India      | Developmental diet  | 2         | 128487.61 | 18.77           | < 0.0001        | Developmental diet  | 2         | 92118.83  | 13.99           | < 0.0001        |
|            |            | Thorax length       | 1         | 17502.31  | 5.11            | 0.026           | Ovariole number     | 1         | 28603.76  | 8.69            | 0.004           |
|            |            | Error               | 85        | 290922.44 | -               | -               | Error               | 85        | 279820.98 | -               | -               |
|            | Slovakia   | Developmental diet  | 2         | 21570.70  | 1.80            | 0.172           | Developmental diet  | 2         | 29518.43  | 2.40            | 0.098           |
|            |            | Thorax length       | 1         | 13092.06  | 2.18            | 0.144           | Ovariole number     | 1         | 406.52    | 0.07            | 0.798           |
|            |            | Error               | 79        | 473998.04 | -               | -               | Error               | 79        | 486683.58 | -               | -               |
| 10% sugar  | India      | Developmental diet  | 2         | 66679.73  | 13.43           | < 0.0001        | Developmental diet  | 2         | 50196.87  | 9.56            | 0.0002          |
|            |            | Thorax length       | 1         | 17375.67  | 7.00            | 0.01            | Ovariole number     | 1         | 5324.93   | 2.03            | 0.158           |
|            |            | Error               | 84        | 208545.47 | -               | -               | Error               | 84        | 220596.22 | -               | -               |
|            | Slovakia   | Developmental diet  | 2         | 29286.20  | 3.20            | 0.046           | Developmental diet  | 2         | 12600.23  | 1.12            | 0.330           |
|            |            | Thorax length       | 1         | 89301.43  | 19.51           | < 0.0001        | Ovariole number     | 1         | 7012.69   | 1.25            | 0.267           |
|            |            | Error               | 80        | 366237.82 | -               | -               | Error               | 80        | 448526.56 | -               | -               |
| 25% sugar  | India      | Developmental diet  | 2         | 29316.87  | 10.78           | < 0.0001        | Developmental diet  | 2         | 21543.05  | 7.60            | 0.001           |
|            |            | Thorax length       | 1         | 13619.84  | 10.01           | 0.002           | Ovariole number     | 1         | 8708.94   | 6.14            | 0.015           |
|            |            | Error               | 85        | 115599.18 | -               | -               | Error               | 85        | 120510.09 | -               | -               |
|            | Slovakia   | Developmental diet  | 2         | 17824.50  | 3.53            | 0.034           | Developmental diet  | 2         | 18624.32  | 3.24            | 0.044           |
|            |            | Thorax length       | 1         | 27736.31  | 10.98           | 0.001           | Ovariole number     | 1         | 37.26     | 0.01            | 0.910           |
|            |            | Error               | 80        | 202170.06 | -               | -               | Error               | 80        | 229869.11 | -               | -               |

**Table S10.** The results of ANOVA for the effect of population and **the yeast or sugar content** in the developmental diet, and their interactions on the fat and glycogen content at emergence. *df* - degrees of freedom; SSQ - the sum of squares for each source of variation.

| <b>Dietary component</b> | <b>Trait</b> | <b>Source of variation</b>      | <b><i>df</i></b> | <b>SSQ</b> | <b><i>F</i>-ratio</b> | <b><i>P</i>-value</b> |
|--------------------------|--------------|---------------------------------|------------------|------------|-----------------------|-----------------------|
| Yeast                    | Fat          | Population                      | 1                | 2893.82    | 103.93                | < 0.0001              |
|                          |              | Developmental diet              | 2                | 2059.03    | 36.97                 | < 0.0001              |
|                          |              | Population × Developmental diet | 2                | 6.12       | 0.11                  | 0.896                 |
|                          |              | Error                           | 30               | 835.36     | -                     | -                     |
|                          | Glycogen     | Population                      | 1                | 2.10       | 2.17                  | 0.151                 |
|                          |              | Developmental diet              | 2                | 7.20       | 3.72                  | 0.036                 |
|                          |              | Population × Developmental diet | 2                | 0.08       | 0.04                  | 0.958                 |
|                          |              | Error                           | 30               | 29.05      | -                     | -                     |
| Sugar                    | Fat          | Population                      | 1                | 3386.42    | 200.08                | < 0.0001              |
|                          |              | Developmental diet              | 2                | 5166.70    | 152.63                | < 0.0001              |
|                          |              | Population × Developmental diet | 2                | 79.08      | 2.34                  | 0.114                 |
|                          |              | Error                           | 30               | 507.76     | -                     | -                     |
|                          | Glycogen     | Population                      | 1                | 6.97       | 13.26                 | 0.001                 |
|                          |              | Developmental diet              | 2                | 17.39      | 16.55                 | < 0.0001              |
|                          |              | Population × Developmental diet | 2                | 6.60       | 6.29                  | 0.005                 |
|                          |              | Error                           | 30               | 15.76      | -                     | -                     |

**Table S11.** The results of ANOVA for the effect of population, the **yeast content** in the developmental and the adult diet, and their interactions on the fat content and glycogen content in 10-day old males. *df* - degrees of freedom; SSQ - the sum of squares for each source of variation.

| <b>Trait</b> | <b>Source of variation</b>                   | <b><i>df</i></b> | <b>SSQ</b> | <b><i>F</i>-ratio</b> | <b><i>P</i>-value</b> |
|--------------|----------------------------------------------|------------------|------------|-----------------------|-----------------------|
| Fat          | Population                                   | 1                | 120.13     | 4.08                  | 0.046                 |
|              | Developmental diet                           | 2                | 3928.50    | 66.71                 | < 0.0001              |
|              | Adult diet                                   | 2                | 1473.78    | 25.03                 | < 0.0001              |
|              | Population × Developmental diet              | 2                | 176.63     | 3.00                  | 0.055                 |
|              | Population × Adult diet                      | 2                | 830.92     | 14.11                 | < 0.0001              |
|              | Developmental diet × Adult diet              | 4                | 143.81     | 1.22                  | 0.308                 |
|              | Population × Developmental diet × Adult diet | 4                | 383.75     | 3.26                  | 0.015                 |
|              | Error                                        | 90               | 2650.11    | -                     | -                     |
| Glycogen     | Population                                   | 1                | 2419.53    | 162.01                | < 0.0001              |
|              | Developmental diet                           | 2                | 15.23      | 0.51                  | 0.602                 |
|              | Adult diet                                   | 2                | 211.71     | 7.09                  | 0.001                 |
|              | Population × Developmental diet              | 2                | 1.73       | 0.06                  | 0.944                 |
|              | Population × Adult diet                      | 2                | 202.22     | 6.77                  | 0.002                 |
|              | Developmental diet × Adult diet              | 4                | 37.00      | 0.62                  | 0.650                 |
|              | Population × Developmental diet × Adult diet | 4                | 90.25      | 1.51                  | 0.206                 |
|              | Error                                        | 89               | 1329.17    | -                     | -                     |

**Table S12.** The results of ANOVA for the effect of population, the **sugar content** in the developmental and the adult diet, and their interactions on fat content and glycogen content in 10-day old males. *df* - degrees of freedom; SSQ - the sum of squares for each source of variation.

| <b>Trait</b> | <b>Source of variation</b>                   | <b><i>df</i></b> | <b>SSQ</b> | <b><i>F</i>-ratio</b> | <b><i>P</i>-value</b> |
|--------------|----------------------------------------------|------------------|------------|-----------------------|-----------------------|
| Fat          | Population                                   | 1                | 62.03      | 4.30                  | 0.041                 |
|              | Developmental diet                           | 2                | 102.91     | 3.57                  | 0.032                 |
|              | Adult diet                                   | 2                | 107.45     | 3.73                  | 0.028                 |
|              | Population × Developmental diet              | 2                | 106.00     | 3.68                  | 0.029                 |
|              | Population × Adult diet                      | 2                | 13.52      | 0.47                  | 0.627                 |
|              | Developmental diet × Adult diet              | 4                | 83.35      | 1.45                  | 0.226                 |
|              | Population × Developmental diet × Adult diet | 4                | 34.73      | 0.60                  | 0.662                 |
|              | Error                                        | 90               | 1297.28    | -                     | -                     |
| Glycogen     | Population                                   | 1                | 1608.25    | 154.39                | < 0.0001              |
|              | Developmental diet                           | 2                | 111.67     | 5.36                  | 0.006                 |
|              | Adult diet                                   | 2                | 282.33     | 13.55                 | < 0.0001              |
|              | Population × Developmental diet              | 2                | 81.52      | 3.91                  | 0.024                 |
|              | Population × Adult diet                      | 2                | 196.09     | 9.41                  | 0.0002                |
|              | Developmental diet × Adult diet              | 4                | 95.27      | 2.29                  | 0.066                 |
|              | Population × Developmental diet × Adult diet | 4                | 48.67      | 1.17                  | 0.330                 |
|              | Error                                        | 90               | 937.54     | -                     | -                     |

**Table S13.** The results of ANOVA for the effect of population, the **yeast content** in the developmental and the adult diet, and a match/mismatch between developmental and adult nutritional environment on fat content and glycogen content in 10-day old males. *df* - degrees of freedom; SSQ - the sum of squares for each source of variation.

| <b>Trait</b> | <b>Source of variation</b> | <b><i>df</i></b> | <b>SSQ</b> | <b><i>F</i>-ratio</b> | <b><i>P</i>-value</b> |
|--------------|----------------------------|------------------|------------|-----------------------|-----------------------|
| Fat          | Population                 | 1                | 120.13     | 2.97                  | 0.088                 |
|              | Developmental diet         | 2                | 3977.41    | 49.17                 | < 0.0001              |
|              | Adult diet                 | 2                | 1524.56    | 18.85                 | < 0.0001              |
|              | Mismatch                   | 2                | 140.37     | 1.74                  | 0.182                 |
|              | Error                      | 100              | 4044.86    | -                     | -                     |
| Glycogen     | Population                 | 1                | 2403.99    | 143.83                | < 0.0001              |
|              | Developmental diet         | 2                | 16.00      | 0.48                  | 0.621                 |
|              | Adult diet                 | 2                | 208.46     | 6.24                  | 0.003                 |
|              | Mismatch                   | 2                | 6.20       | 0.19                  | 0.831                 |
|              | Error                      | 99               | 1654.69    | -                     | -                     |

**Table S14.** The results of ANOVA for the effect of population, the **sugar content** in the developmental and the adult diet, and a match/mismatch between developmental and adult nutritional environment on fat content and glycogen content in 10-day old males. *df* - degrees of freedom; SSQ - the sum of squares for each source of variation.

| <b>Trait</b> | <b>Source of variation</b> | <b><i>df</i></b> | <b>SSQ</b> | <b><i>F</i>-ratio</b> | <b><i>P</i>-value</b> |
|--------------|----------------------------|------------------|------------|-----------------------|-----------------------|
| Fat          | Population                 | 1                | 62.03      | 4.23                  | 0.042                 |
|              | Developmental diet         | 2                | 147.86     | 5.05                  | 0.008                 |
|              | Adult diet                 | 2                | 101.34     | 3.46                  | 0.035                 |
|              | Mismatch                   | 2                | 69.98      | 2.39                  | 0.097                 |
|              | Error                      | 100              | 1464.89    | -                     | -                     |
| Glycogen     | Population                 | 1                | 1608.25    | 119.75                | < 0.0001              |
|              | Developmental diet         | 2                | 109.84     | 4.09                  | 0.020                 |
|              | Adult diet                 | 2                | 231.24     | 8.61                  | 0.0004                |
|              | Mismatch                   | 2                | 16.06      | 0.60                  | 0.552                 |
|              | Error                      | 100              | 1343.03    | -                     | -                     |
